# Supplementary material for: An Alternative Approach to ChIP-Seq Normalization Enables Detection of Genome-Wide Changes in Histone H3 Lysine 27 Trimethylation upon EZH2 Inhibition
Source: PubMed Central journal article supplement (PMC5119738; doi:10.1371/journal.pone.0166438), 2016-11-22

**A**H2Av and H3K27me3 ChIP-qPCR with *Drosophila* chromatin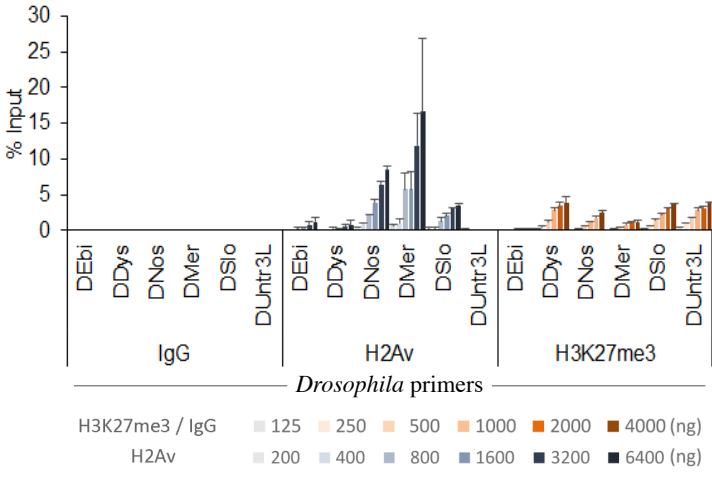**B**

H2Av and H3K27me3 ChIP-qPCR with human chromatin

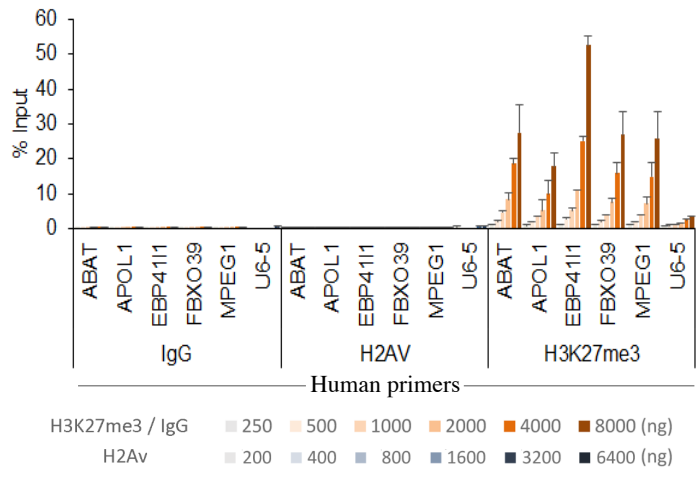H2Av ChIP-Seq with *Drosophila* chromatin**C**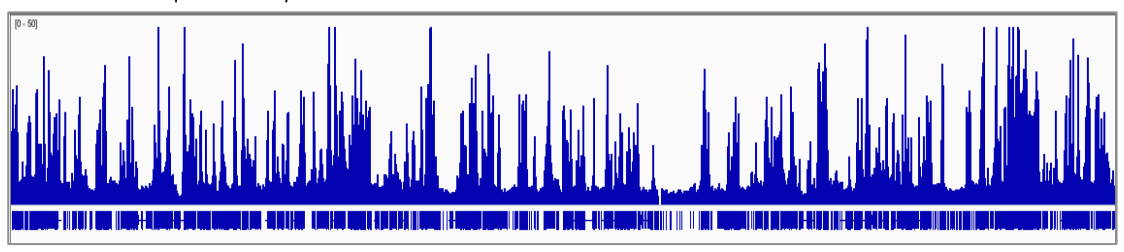

H2Av ChIP-Seq with human chromatin

**D**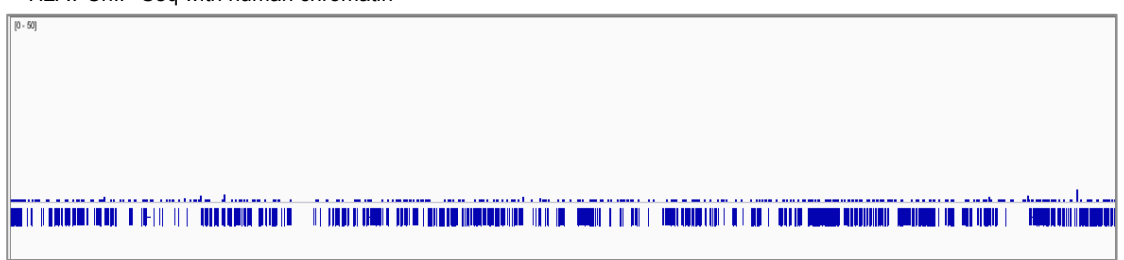

Supplement: pone.0166438.s004.pdf [file pone.0166438.s004.pdf]
