# Supplementary material for: An Alternative Approach to ChIP-Seq Normalization Enables Detection of Genome-Wide Changes in Histone H3 Lysine 27 Trimethylation upon EZH2 Inhibition
Source: PubMed Central journal article supplement (PMC5119738; doi:10.1371/journal.pone.0166438), 2016-11-22

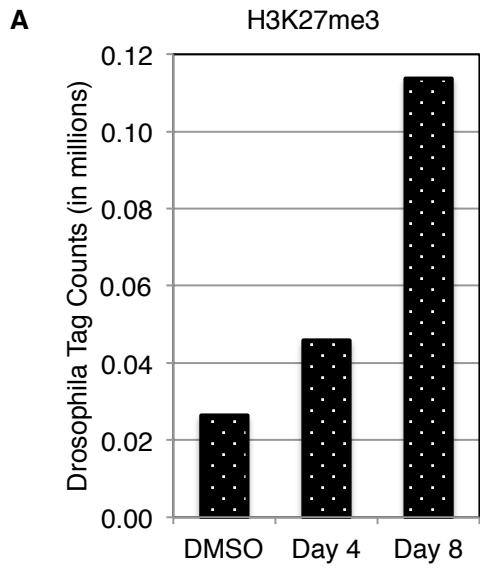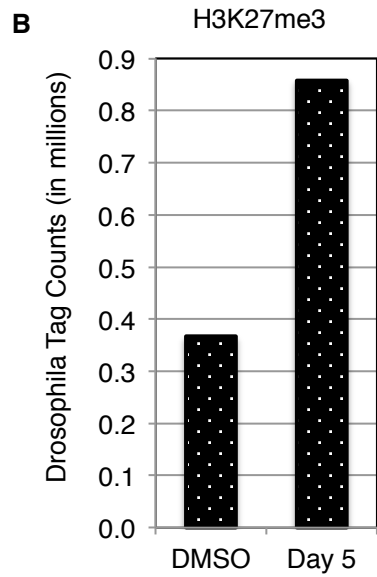

Supplement: pone.0166438.s006.pdf [file pone.0166438.s006.pdf]
