# Supplementary material for: An Alternative Approach to ChIP-Seq Normalization Enables Detection of Genome-Wide Changes in Histone H3 Lysine 27 Trimethylation upon EZH2 Inhibition
Source: PubMed Central journal article supplement (PMC5119738; doi:10.1371/journal.pone.0166438), 2016-11-22
Supplement: pone.0166438.s009.pdf [file pone.0166438.s009.pdf]

DMSO    CPI-360  
D4 D8

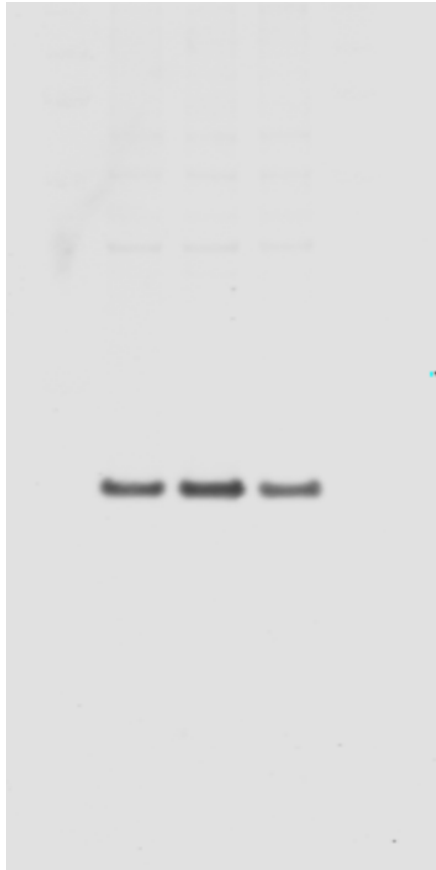

Histone H3 blot

DMSO    CPI-360  
D4 D8

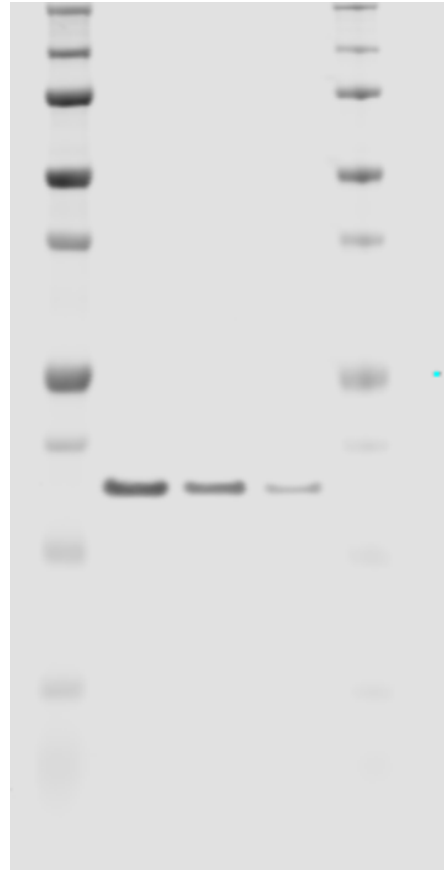

H3K27me3 blot
