# Supplementary material for: An Alternative Approach to ChIP-Seq Normalization Enables Detection of Genome-Wide Changes in Histone H3 Lysine 27 Trimethylation upon EZH2 Inhibition
Source: PubMed Central journal article supplement (PMC5119738; doi:10.1371/journal.pone.0166438), 2016-11-22
Supplement: pone.0166438.s012.pdf [file pone.0166438.s012.pdf]

| <b>H3K27me3</b>            | Total ng | DMSO/inhibitor<br>Fold change |
|----------------------------|----------|-------------------------------|
| Karpas-422 8 days, DMSO    | 12.0     |                               |
| Karpas-422 4 days, CPI-360 | 3.0      | 4.0                           |
| Karpas-422 8 days, CPI-360 | 2.4      | 5.0                           |
|                            |          |                               |
| PC9 5 days, DMSO           | 0.84     |                               |
| PC9 5 days, GSK126         | 0.21     | 3.9                           |
|                            |          |                               |
