# Supplementary material for: An Alternative Approach to ChIP-Seq Normalization Enables Detection of Genome-Wide Changes in Histone H3 Lysine 27 Trimethylation upon EZH2 Inhibition
Source: PubMed Central journal article supplement (PMC5119738; doi:10.1371/journal.pone.0166438), 2016-11-22
Supplement: pone.0166438.s013.pdf [file pone.0166438.s013.pdf]

| Sample                         | Antibody | Library yield [ng] |
|--------------------------------|----------|--------------------|
| KARPAS-422 DMSO 8 days         | H3K27me3 | 90                 |
| KARPAS-422 4 days CPI360       | H3K27me3 | 76                 |
| KARPAS-422 8 day CPI-360       | H3K27me3 | 79                 |
|                                |          |                    |
| KARPAS-422 DMSO 8 days         | H3K9me3  | 101                |
| KARPAS-422 4 days CPI360       | H3K9me3  | 96                 |
| KARPAS-422 8 day CPI-360       | H3K9me3  | 99                 |
|                                |          |                    |
| KARPAS-422 DMSO 8 days, rep2   | H3K27me3 | 87                 |
| KARPAS-422 4 days CPI360, rep2 | H3K27me3 | 84                 |
| KARPAS-422 8 day CPI-360, rep2 | H3K27me3 | 91                 |
|                                |          |                    |
| PC9 control cells              | H3K27me3 | 71                 |
| PC9 EZH2 inhibitor             | H3K27me3 | 64                 |
|                                |          |                    |
| PC9 control cells              | H3K4me3  | 25                 |
| PC9 EZH2 inhibitor             | H3K4me3  | 32                 |
|                                |          |                    |
| PC9 control cells, rep2        | H3K27me3 | 67                 |
| PC9 EZH2 inhibitor, rep2       | H3K27me3 | 60                 |
|                                |          |                    |
| PC9 control cells, rep2        | H3K4me3  | 63                 |
| PC9 EZH2 inhibitor, rep2       | H3K4me3  | 61                 |
