# Supplementary material for: An Alternative Approach to ChIP-Seq Normalization Enables Detection of Genome-Wide Changes in Histone H3 Lysine 27 Trimethylation upon EZH2 Inhibition
Source: PubMed Central journal article supplement (PMC5119738; doi:10.1371/journal.pone.0166438), 2016-11-22
Supplement: pone.0166438.s014.pdf [file pone.0166438.s014.pdf]

| Cell lines                                                                    | KARPAS-422 |       |         |       | PC9      |       |         |       |
|-------------------------------------------------------------------------------|------------|-------|---------|-------|----------|-------|---------|-------|
| Antibodies                                                                    | H3K27me3   |       | H3K9me3 |       | H3K27me3 |       | H3K4me3 |       |
| replicate                                                                     | 1          | 2     | 1       | 2     | 1        | 2     | 1       | 2     |
| Ratio of human reads from DMSO and EZH2 inhibitor treated samples             |            |       |         |       |          |       |         |       |
| All tag counts                                                                | 0.342      | 0.278 | 1.228   | 1.051 | 0.231    | 0.196 | 0.836   | 0.869 |
| H2Av peaks                                                                    | 0.333      | 0.236 | 1.187   | 1.091 | 0.238    | 0.286 | 0.853   | 0.872 |
| H3K27me3 peaks                                                                | 0.329      | 0.311 | 1.326   | 0.967 | 0.226    | 0.174 | 0.803   | 0.860 |
| Ratio of <i>Drosophila</i> reads from DMSO and EZH2 inhibitor treated samples |            |       |         |       |          |       |         |       |
| All tag counts                                                                | 4.188      | 3.362 | 0.975   | 0.837 | 3.550    | 3.413 | 1.228   | 1.546 |
| H2Av peaks                                                                    | 4.297      | 3.962 | 1.009   | 0.806 | 3.442    | 2.339 | 1.204   | 1.540 |
| H3K27me3 peaks                                                                | 4.343      | 3.010 | 0.903   | 0.910 | 3.632    | 3.842 | 1.279   | 1.562 |
